# Supplementary material for: Wettability of Amino Acid-Functionalized PSMA Electrospun Fibers for the Modulated Release of Active Agents and Its Effect on Their Bioactivity
Source: MDPI journal article supplement (doi:10.3390/pharmaceutics15061659), 2023-06-05
Supplement: s1 [file s1]

Type of the Paper (Article)

# Wettability of Amino Acid-functionalized PSMA Electrospun fibers for the Modulated Release of Active Agents and its Effect on their Bioactivity

Sebastián Santander <sup>1</sup>, Nicolás Padilla-Manzano <sup>1</sup>, Bastián Díaz <sup>1</sup>, Renato Bacchiega <sup>1</sup>, Elizabeth Jara <sup>1</sup>, Luis Felipe Álvarez <sup>1</sup>, Cristóbal Pinto <sup>1</sup>, Juan C. Forero <sup>2</sup>, Paula Santana <sup>3</sup>, Eugenio Hamm <sup>4</sup>, Marcela Urzúa <sup>1\*</sup>, Laura Tamayo <sup>1\*</sup>

<sup>1</sup> Departamento de Química, Facultad de Ciencias, Universidad de Chile, Las Palmeras 3425, Santiago, Chile.

<sup>2</sup> Escuela de Ciencias de la Salud, Universidad de Viña del Mar. Cod. postal: 2572007. Viña del Mar, Valparaíso, Chile.

<sup>3</sup> Instituto de Ciencias Químicas Aplicadas, Facultad de Ingeniería, Universidad Autónoma de Chile, El Llano Subercaseaux 2801, San Miguel, Santiago 8910060, Chile.

<sup>4</sup> Departamento de Física, Facultad de Ciencia, Universidad de Santiago de Chile, av. Víctor Jara 3493, Estación Central, Santiago, Chile

\* Correspondence: [laura.tamayo@uchile.cl](mailto:laura.tamayo@uchile.cl), [maurzua@uchile.cl](mailto:maurzua@uchile.cl).

**Keywords:** Fibers; functionalization; amino acid; electrospinning; wettability; release.

**Citation:** To be added by editorial staff during production.

Academic Editor: Firstname Last-name

Received: date

Revised: date

Accepted: date

Published: date

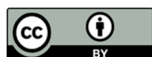

**Copyright:** © 2023 by the authors.

Submitted for possible open access publication under the terms and conditions of the Creative Commons Attribution (CC BY) license (<https://creativecommons.org/licenses/by/4.0/>).

## 1. Supplementary Material

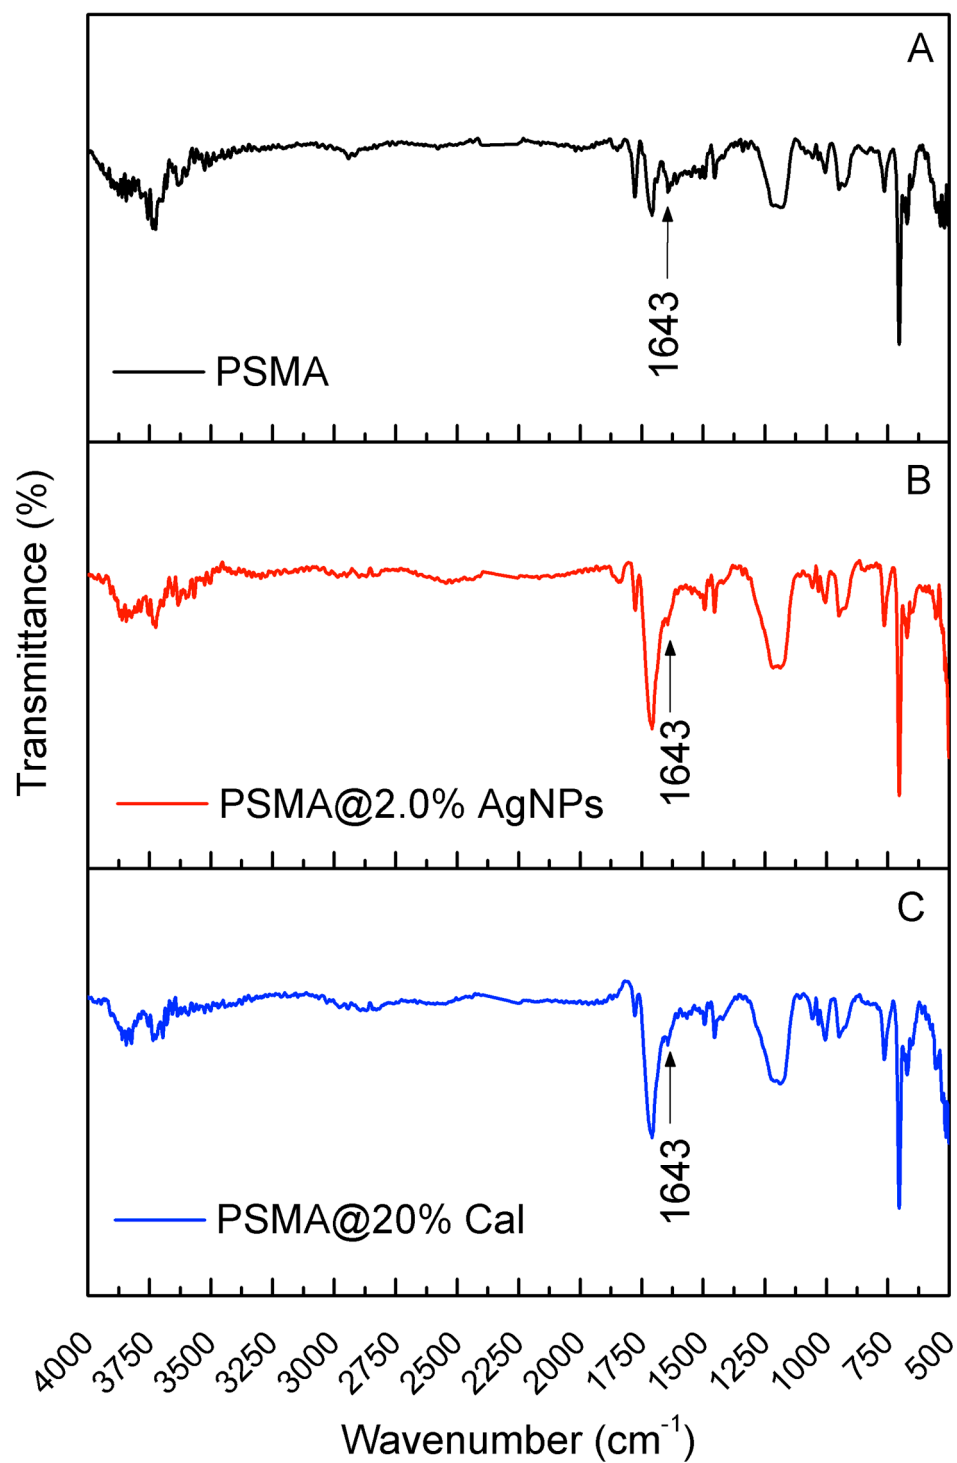

Figure S1. ATR-FTIR spectra of mats of (a) PSMA, (b) PSMA-AgNPs (2.0 wt.%) and (c) PSMA-Cal (20 wt.%).

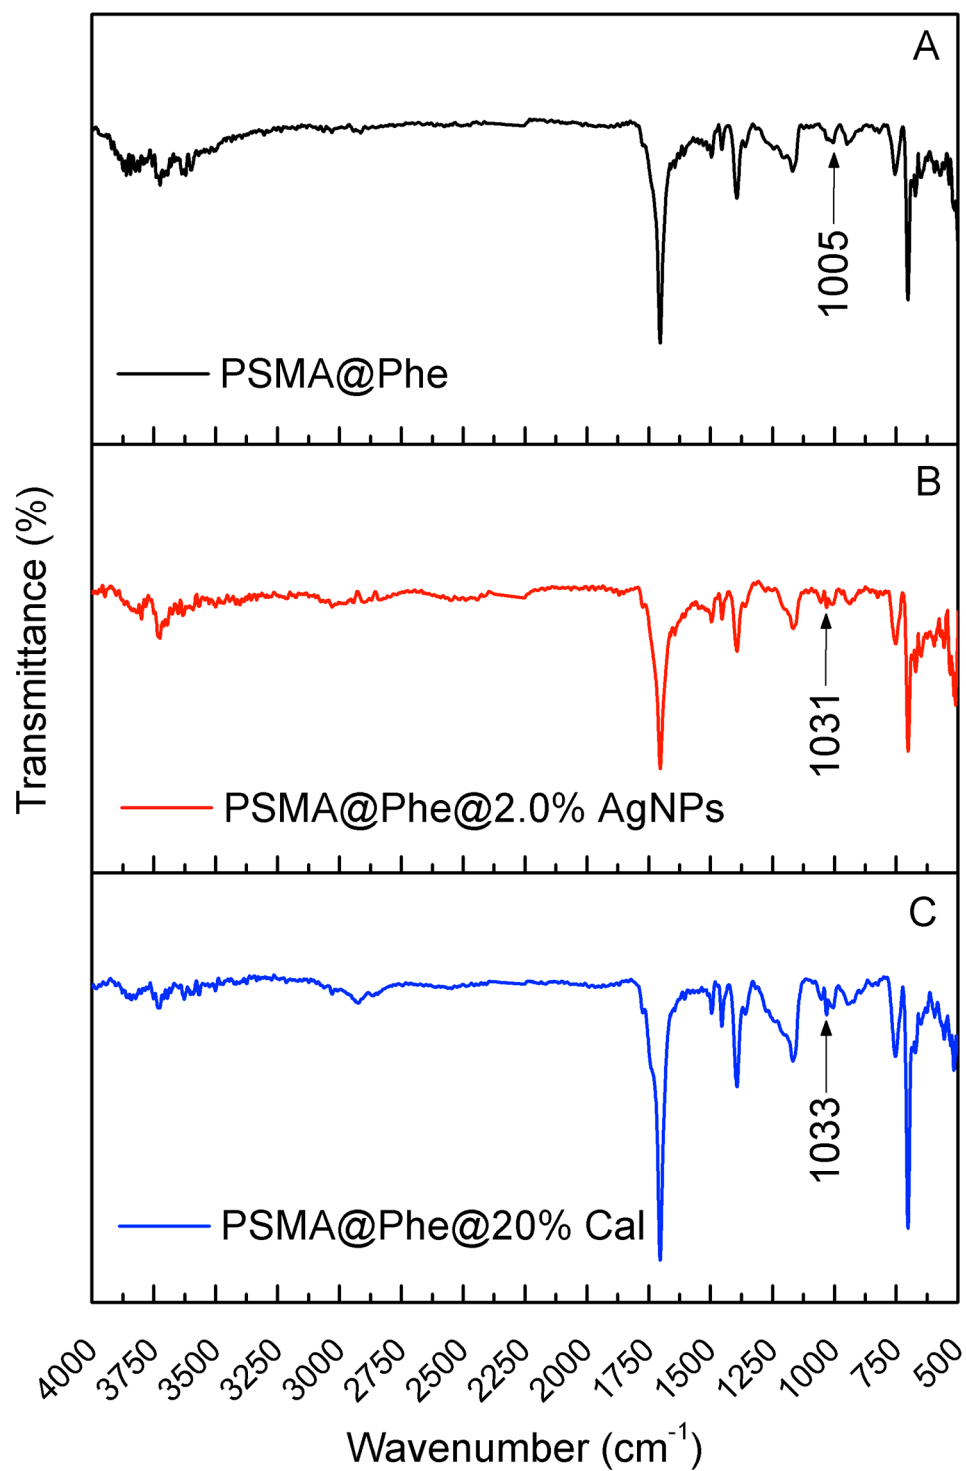

Figure S2. ATR-FTIR spectra of mats of (a) PSMA@Phe, (b) PSMA@Phe-AgNPs (2.0 wt.%) and (c) PSMA@Phe-Cal (20 wt.%).

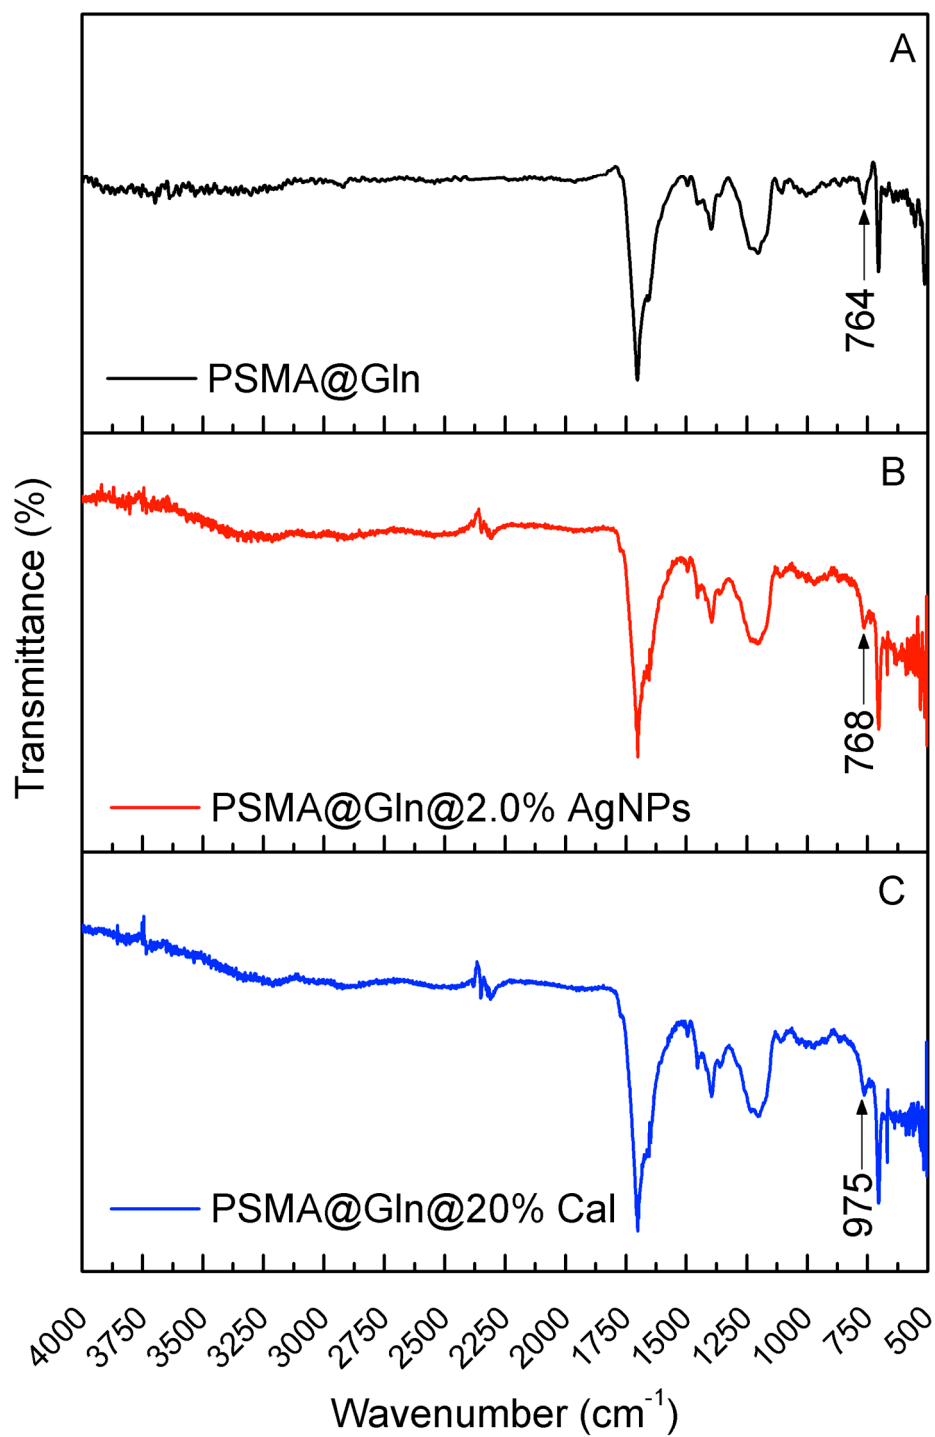

Figure S3. ATR-FTIR spectra of mats of (a) PSMA@Gln, (b) PSMA@Gln-AgNPs (2.0 wt.%) and (c) PSMA@Gln-Cal (20 wt.%).

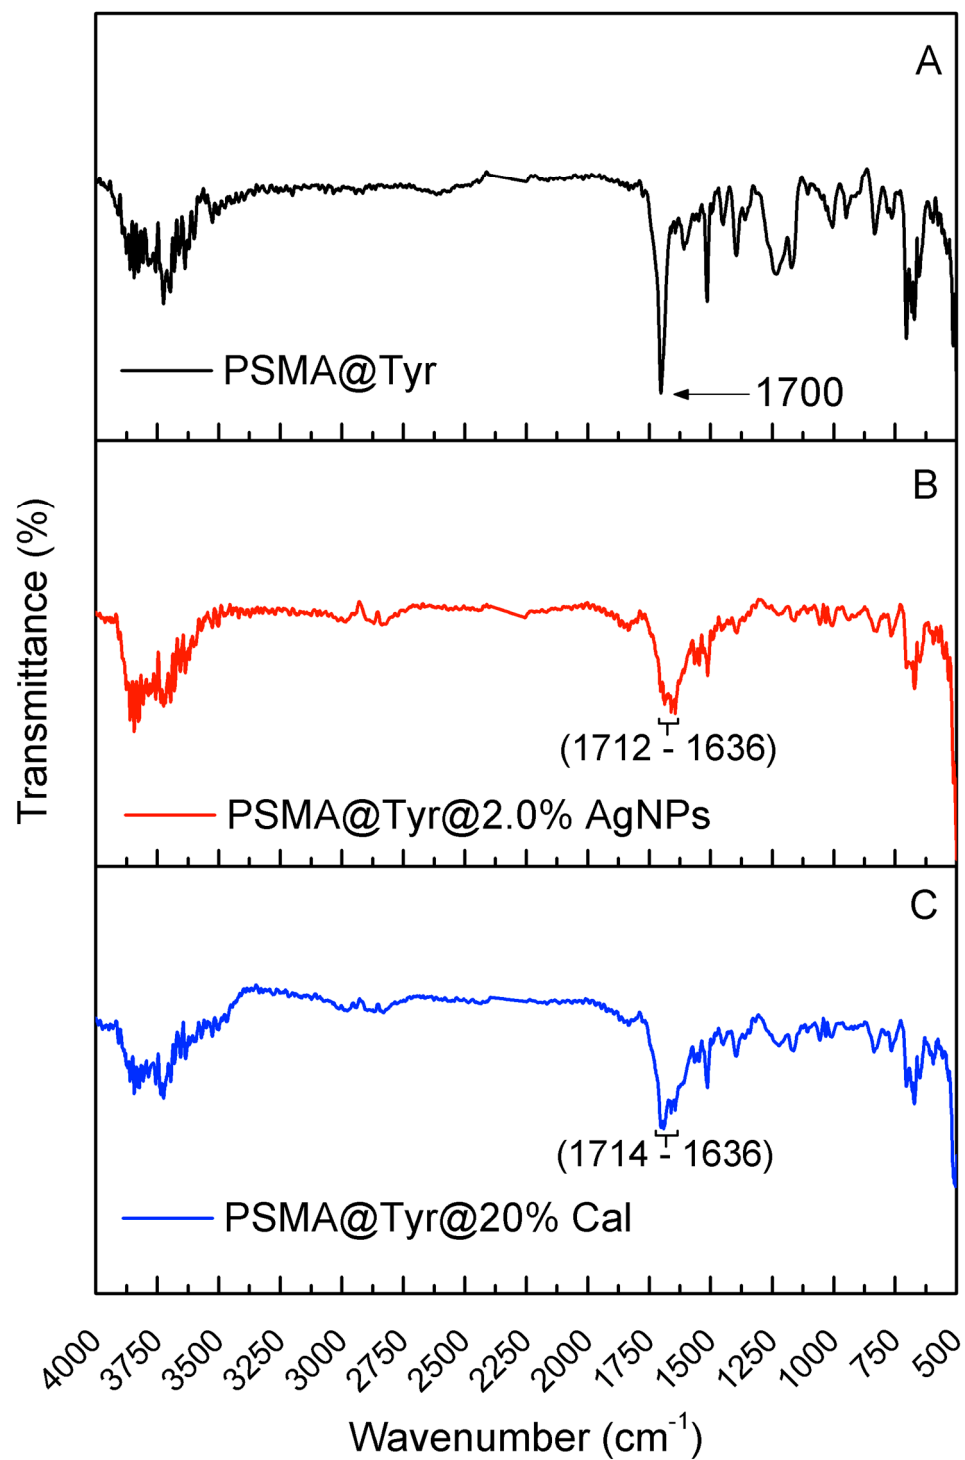

Figure S4. ATR-FTIR spectra of mats of (a) PSMA@Tyr, (b) PSMA@Tyr-AgNPs (2.0 wt.%) and (c) PSMA@Tyr-Cal (20 wt.%).

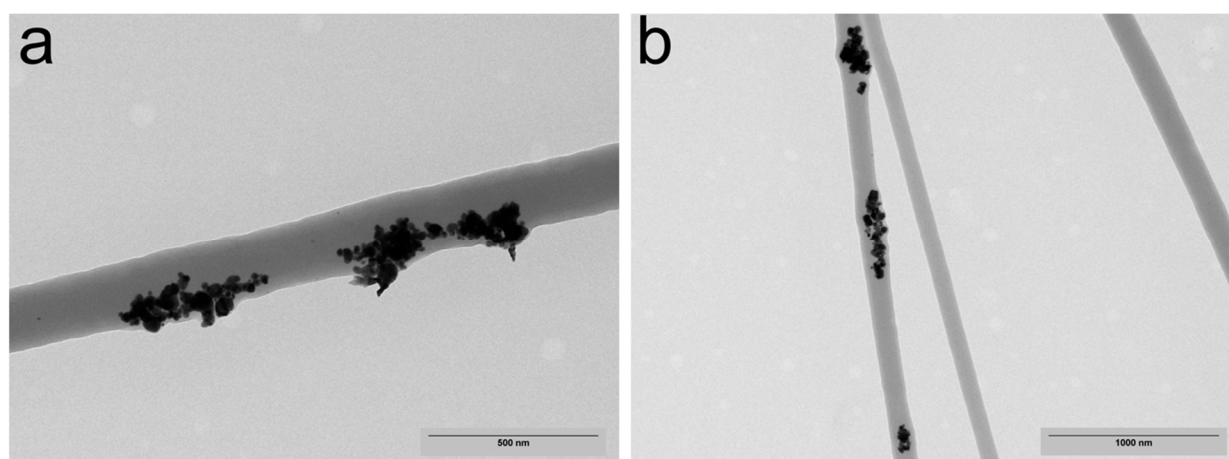

**Figure S5.** PSMA and PSMA@Phe fibers containing AgNPs aggregates. (a) PSMA 2.0 wt.%, (b) PSMA@Phe 2.0 wt.%.

**Table S1.** Advancing, receding and hysteresis contact angle of PSMA mats with different concentrations of active agent.

|      | Active Agent (wt.%) | Advancing contact angle (°) | Receding contact angle (°) | Hysteresis (°) |
|------|---------------------|-----------------------------|----------------------------|----------------|
| PSMA | -                   | 132.7                       | 116.4                      | 16.3           |
|      | 5 cal               | 124.6                       | 90.3                       | 34.3           |
|      | 10 cal              | 133.4                       | 124.5                      | 8.9            |
|      | 15 cal              | 133.5                       | 127.2                      | 6.3            |
|      | 20 cal              | 134.3                       | 125.0                      | 9.3            |
|      | 0.5 AgNPs           | 127.2                       | 114.0                      | 13.2           |
|      | 1.0 AgNPs           | 137.6                       | 113.1                      | 24.5           |
|      | 1.5 AgNPs           | 130.6                       | 108.6                      | 22.0           |
|      | 2.0 AgNPs           | 123.0                       | 106.5                      | 16.5           |

**Table S2.** Advancing, receding and hysteresis contact angle of PSMA@Phe mats with different concentrations of active agent.

|          | Active Agent (wt%) | Advancing contact angle (°) | Receding contact angle (°) | Hysteresis (°) |
|----------|--------------------|-----------------------------|----------------------------|----------------|
| PSMA@Phe | -                  | 136.8                       | 129.5                      | 7.3            |
|          | 5 cal              | 135.7                       | 127.8                      | 7.9            |
|          | 10 cal             | 130.2                       | 122.4                      | 7.8            |
|          | 15 cal             | 134.5                       | 126.3                      | 8.2            |
|          | 20 cal             | 134.0                       | 125.1                      | 8.9            |
|          | 0.5 AgNPs          | 130.0                       | 120.2                      | 9.8            |
|          | 1.0 AgNPs          | 129.8                       | 122.7                      | 7.1            |
|          | 1.5 AgNPs          | 132.1                       | 124.9                      | 7.2            |
|          | 2.0 AgNPs          | 126.1                       | 122.5                      | 3.6            |

**Table S3.** Advancing, receding and hysteresis contact angle of PSMA@Tyr mats with different concentrations of active agent.

|          | Active Agent (wt%) | Advancing contact angle (°) | Receding contact angle (°) | Hysteresis (°) |
|----------|--------------------|-----------------------------|----------------------------|----------------|
| PSMA@Tyr | -                  | 130.4                       | 117.9                      | 12.5           |
|          | 5 cal              | 127.4                       | 114.3                      | 13.1           |
|          | 10 cal             | 137.4                       | 118.0                      | 19.4           |
|          | 15 cal             | 130.6                       | 119.6                      | 11.0           |
|          | 20 cal             | 134.1                       | 123.1                      | 11.0           |
|          | 0.5 AgNPs          | 128.3                       | 115.0                      | 13.3           |
|          | 1.0 AgNPs          | 77.2                        | 34.0                       | 43.2           |
|          | 1.5 AgNPs          | 40.6                        | 30.1                       | -              |
|          | 2.0 AgNPs          | 135.5                       | 65.5                       | 70.0           |

**Table S4.** Contact angle at 2 different times,  $t=0$  s and  $t=6$  s of the PSMA@Gln mats with different concentrations of active agent.

|          | Active Agent (wt%) | $t_0$ contact angle (°) | $t_1$ contact angle (°) |
|----------|--------------------|-------------------------|-------------------------|
| PSMA@Gln | -                  | 28.7                    | 25.5                    |
|          | 5 cal              | 29.7                    | 19.8                    |
|          | 10 cal             | 41.5                    | 28.1                    |
|          | 15 cal             | 82.6                    | 46.0                    |
|          | 20 cal             | 32.1                    | 26.0                    |
|          | 0.5 AgNPs          | 22.9                    | 20.8                    |
|          | 1.0 AgNPs          | 36.2                    | 35.6                    |
|          | 1.5 AgNPs          | 27.7                    | 24.2                    |
|          | 2.0 AgNPs          | 32.7                    | 28.9                    |

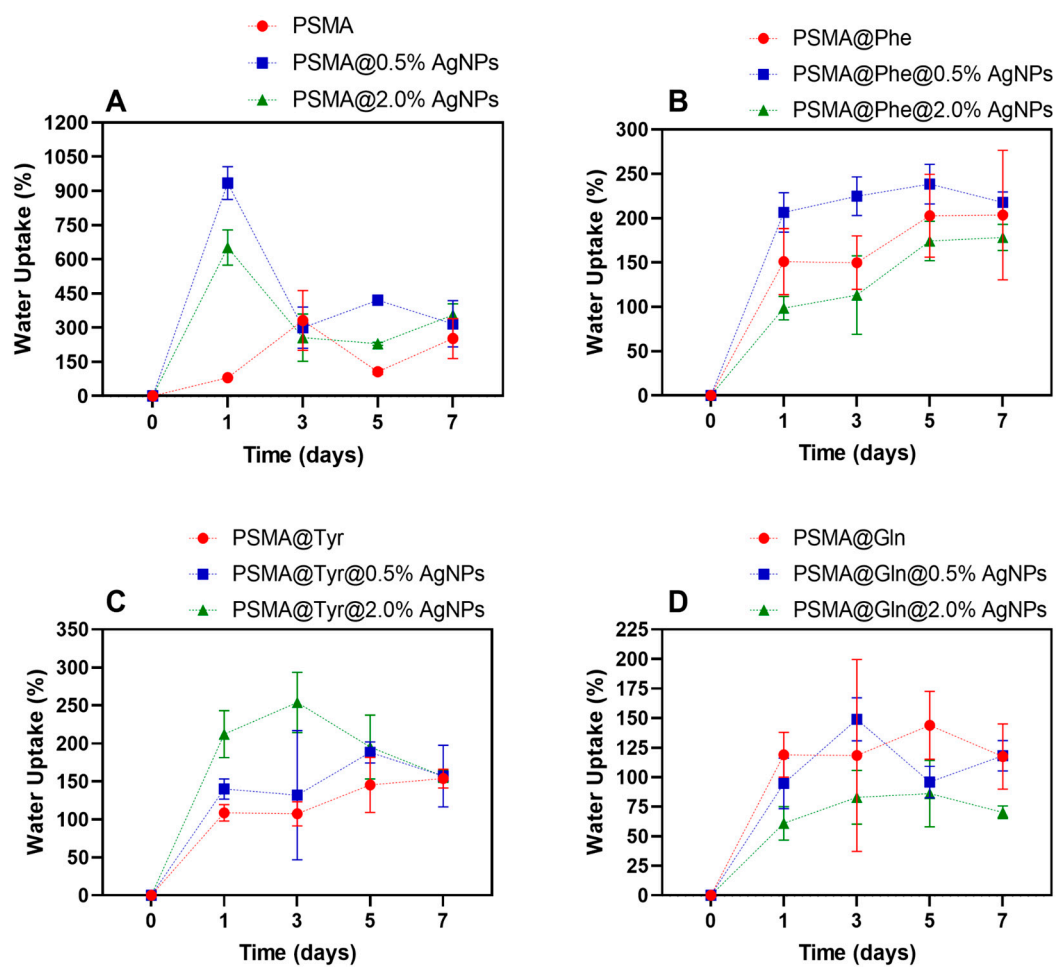

**Figure S6.** Water absorption capacity of PSMA and PSMAf containing concentrations of AgNPs at 0.5 and 2.0 wt.% (a) PSMA, (b) PSMA@Gln, (c) PSMA@Tyr and (d) PSMA@Phe.



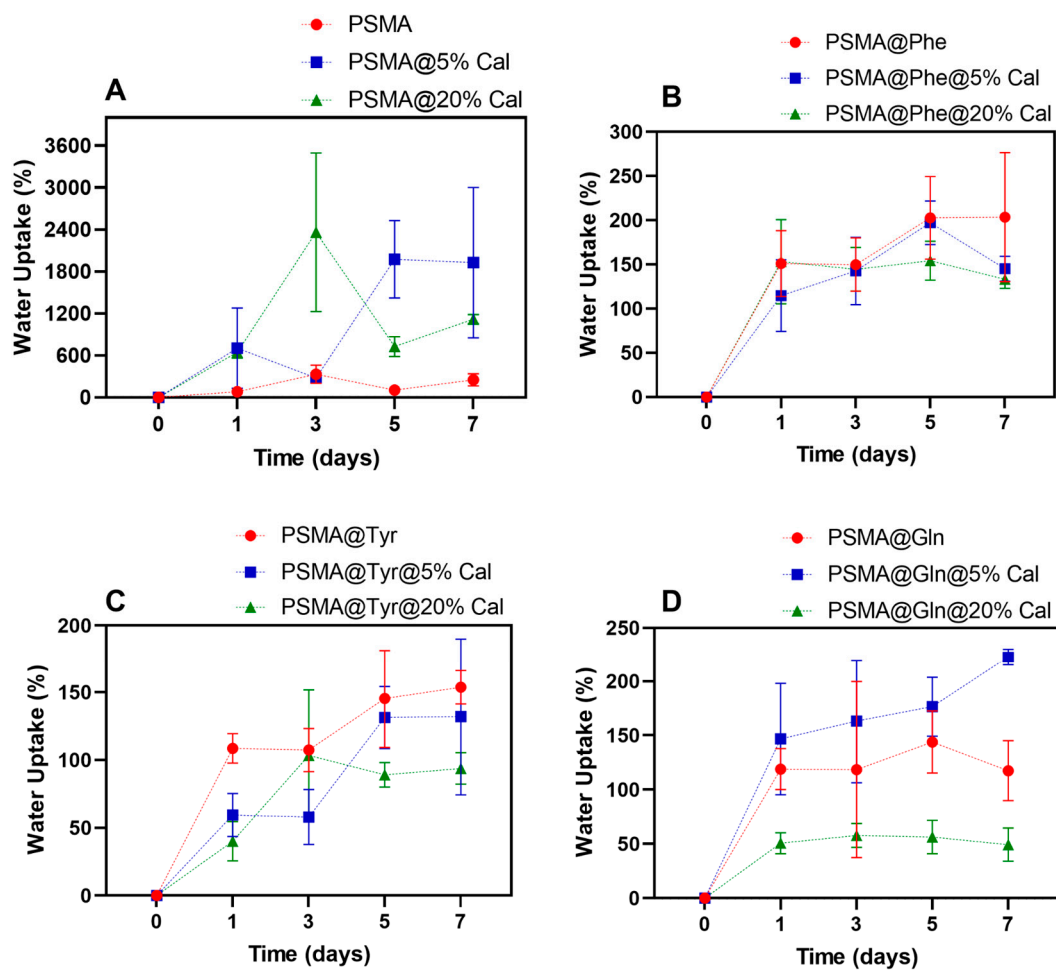

**Figure S7.** Water absorption capacity of PSMA and PSMAf containing *C. officinalis* concentrations at 5 and 20 wt.% (a) PSMA, (b) PSMA@Gln, (c) PSMA@Tyr and (d) PSMA@Phe.

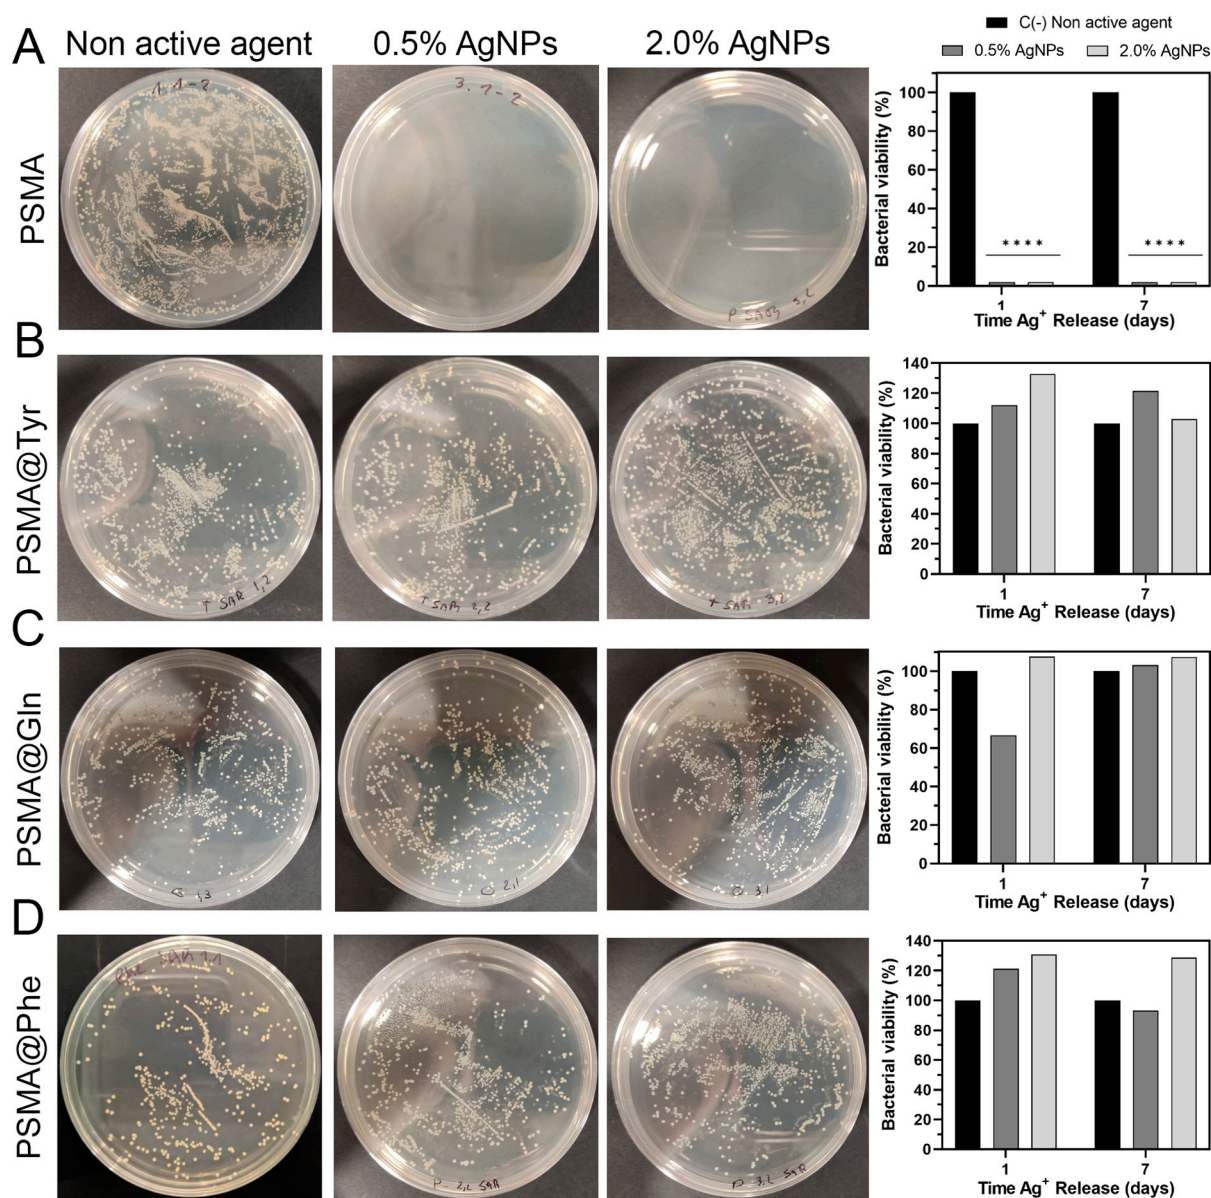

**Figure S8.** Bacterial viability of methicillin-resistant *S. aureus* ATCC 33592 incubated in release solutions of, (a) PSMA, (b) PSMA@Gln, (c) PSMA@Tyr and (d) PSMA@Phe. Data were analyzed using Dunnett's multiple comparisons test; \*\*\*\*  $P < 0.0001$  compared to the negative control group (Non-active agent).
